# Supplementary material for: Soft chemical topotactic synthesis and crystal structure evolution from two-dimensional KV3O8plates to one-dimensional V3O7nanobelts
Source: Royal Society of Chemistry journal article supplement (doi:10.1039/c6ce01696k), 2016-01-01
Supplement: c6ce01696k1.pdf [file c6ce01696k1.pdf]

## Supporting Information

### Soft chemical topotactic synthesis and crystal structure evolution from two-dimension $\text{KV}_3\text{O}_8$ plates to one-dimension $\text{V}_3\text{O}_7$ nanobelts

Puhong Wen\*, Taotao Liu, Fenyan Wei, Lili Ai and Fangyi Yao

Department of Chemistry and Chemical Engineering, Baoji University of Arts and Sciences, No. 1 Hi-Tech Avenue, Baoji, Shaanxi 721013, PR China.

\* Corresponding author. Email: [wenpuhong@hotmail.com](mailto:wenpuhong@hotmail.com)

#### 1. Chemical composition of samples KVO and HVO determined by EDX.

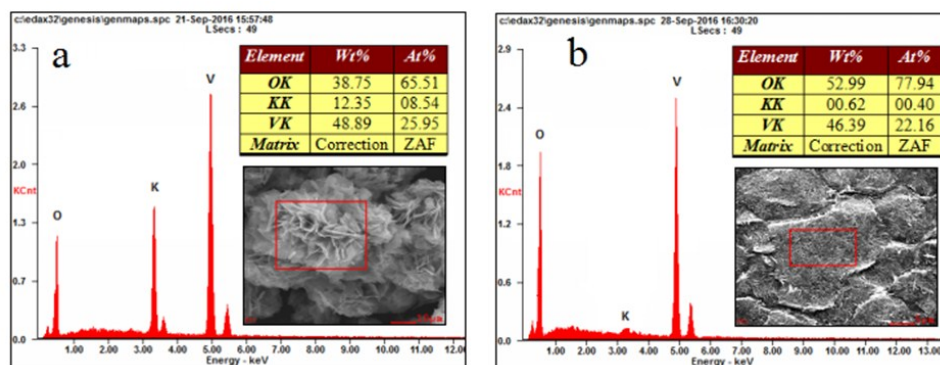

Fig. S1 EDX spectra of the obtained samples KVO (a) and HVO (b).

According to the analysis result of EDX spectra, the chemical formula of KVO sample is  $\text{KV}_3\text{O}_8$ , and that of HVO sample may be  $\text{HV}_3\text{O}_8 \cdot 3\text{H}_2\text{O}$ .

#### 2. Chemical composition of the $\text{V}_3\text{O}_7$ sample determined by XPS.

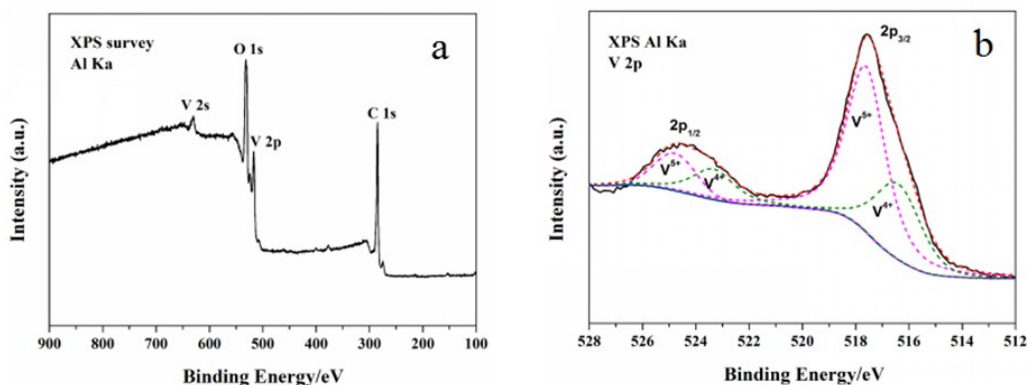

**Fig. S2** XPS survey spectrum (a) and V 2p XPS spectrum (b) of the sample obtained by hydrothermally treating HVO nanobelts colloidal solution at 180 °C for 12 h. The black curve is the experimental result. The dash curves are fitting results.

According to the analysis result ( $V/O = 9.51/23.46$ ) of XPS spectrum, the chemical formula of the sample obtained by hydrothermally treating HVO nanobelts colloidal solutions at 180 °C for 12 h is  $V_3O_7$ .

### 3. FTIR spectrum of the obtained sample HVO.

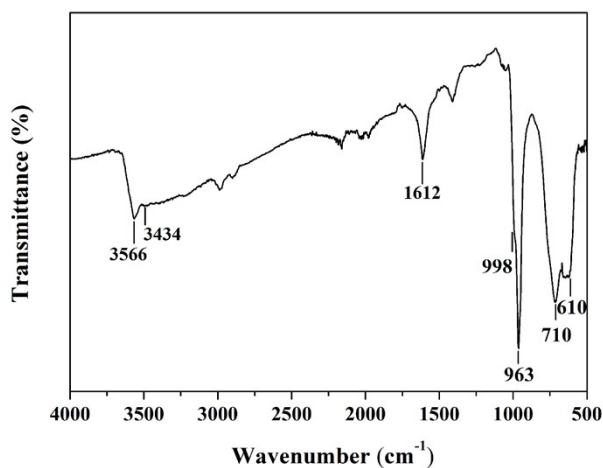

**Fig. S3** FTIR spectrum of the obtained sample HVO.

Stretching vibration peaks of V=O bonds: 998, 963 cm<sup>-1</sup>;

Stretching vibration of V-O-V bonds: 710, 610 cm<sup>-1</sup>;

Stretching vibration of O-H bonds: 3566, 3434 cm<sup>-1</sup>;

Bending vibration of H-O-H bond:  $1612\text{ cm}^{-1}$ .

4. **FE-SEM images of the photoelectrode films of P25 and  $\text{V}_3\text{O}_7$ .**

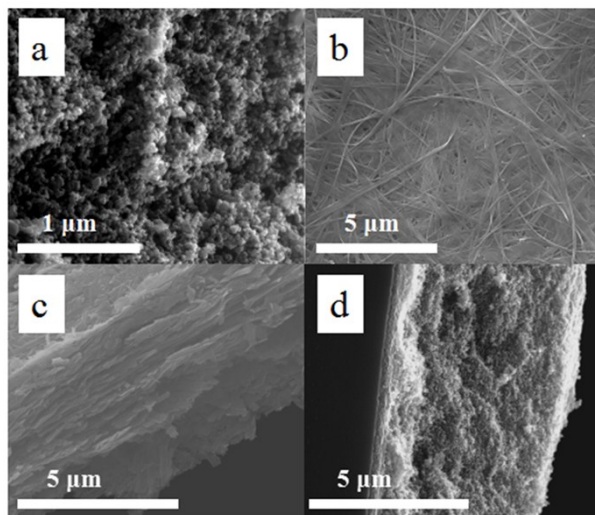

**Fig. S4** FE-SEM images of the photoelectrode films of P25(a, d) and  $\text{V}_3\text{O}_7$ (b, c).
